# Supplementary material
Source: PubMed Central journal article supplement (PMC10807962)

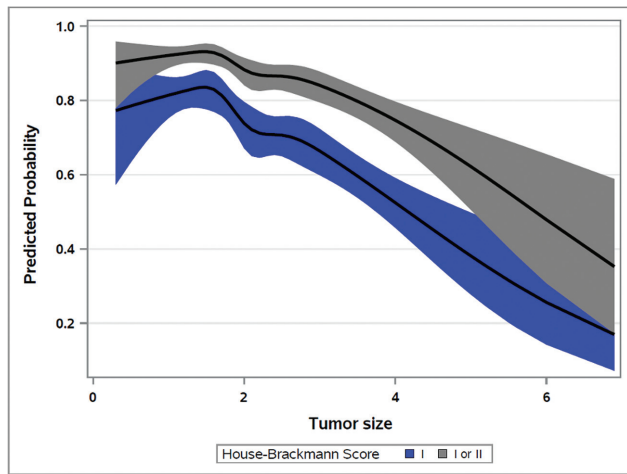

Supplementary Fig. S1 Probability of House-Brackmann scores by tumor size.

Supplement: 10-1055-a-1993-7906-s22jun0346.pdf [file 10-1055-a-1993-7906-s22jun0346.pdf]
